# Supplementary material for: Site-preferential occupancy induced photoluminescence tuning in (Ca,Ba)5(PO4)3Cl:Eu2+ phosphors
Source: Royal Society of Chemistry journal article supplement (doi:10.1039/c6ra08053g), 2016-01-01
Supplement: c6ra08053g1.pdf [file c6ra08053g1.pdf]

## Site-preferential Occupancy Induced Photoluminescence Tuning in $(\text{Ca,Ba})_5(\text{PO}_4)_3\text{Cl}:\text{Eu}^{2+}$ Phosphors

Yi Wei,<sup>a</sup> Xiaohuan Qi,<sup>a</sup> Hui Xiao,<sup>a</sup> Wenzhe Luo,<sup>a</sup> Huan Yao,<sup>a</sup> Lingfei Lv,<sup>a</sup>  
Guogang Li<sup>a,\*</sup> and Jun Lin<sup>b,\*</sup>

<sup>a</sup> Faculty of Materials Science and Chemistry, China University of Geosciences,  
Wuhan 430074, People's Republic of China

<sup>b</sup> State Key Laboratory of Rare Earth Resource Utilization, Changchun Institute  
of Applied Chemistry, Chinese Academy of Sciences, Changchun 130022 (P.  
R. China)

<sup>c</sup> State Key Laboratory of Biogeology and Environmental Geology, China  
University of Geosciences, Wuhan 430074, P. R. China

\*Corresponding authors: G. G. Li, and J. Lin

E-mail address: [ggli8312@gmail.com](mailto:ggli8312@gmail.com); [jlin@ciac.ac.cn](mailto:jlin@ciac.ac.cn);

**Table S1.** Selected interatomic distances in  $\text{Ca}_{4.9(1-x)}\text{Ba}_{4.9x}\text{Eu}_{0.1}(\text{PO}_4)_3\text{Cl}$  ( $x = 0, 0.25, 0.5, 0.75, 1$ ) samples.

| Bond     | Length (Å)  | Bond    | Length (Å)  | Bond    | Length (Å) | Bond    | Length (Å)  |
|----------|-------------|---------|-------------|---------|------------|---------|-------------|
| x = 0    |             |         |             |         |            |         |             |
| Ca1_O1   | 2.59344(2)  |         |             | Ca2_O1  | 3.10307(3) |         |             |
| Ca1_O1   | 2.59371(2)  |         |             | Ca2_O2  | 2.28681(2) |         |             |
| Ca1_O1   | 2.59414(2)  |         |             | Ca2_O3  | 2.44955(2) |         |             |
| Ca1_O2   | 2.43765(2)  |         |             | Ca2_O3  | 2.32385(3) |         |             |
| Ca1_O2   | 2.43699(2)  |         |             | Ca2_O3  | 2.44955(2) |         |             |
| Ca1_O2   | 2.43709(2)  |         |             | Ca2_O3  | 2.32385(3) |         |             |
| Ca1_O3   | 2.84119(3)  |         |             | Ca2_Cl1 | 3.00308(2) |         |             |
| Ca1_O3   | 2.84054(3)  |         |             | Ca2_Cl1 | 3.00308(2) |         |             |
| Ca1_O3   | 2.84146(3)  |         |             |         |            |         |             |
| Ca1-O    | 2.624       |         |             | Ca2-O   | 2.618      |         |             |
| x = 0.25 |             |         |             |         |            |         |             |
| Ca1_O1   | 2.21693(3)  | Ca2_O1  | 3.09359(6)  | Ba1_O1  | 2.59365(4) | Ba2_O1  | 3.09923(6)  |
| Ca1_O1   | 2.21718(3)  | Ca2_O2  | 2.45664(5)  | Ba1_O1  | 2.59386(4) | Ba2_O2  | 2.44036(5)  |
| Ca1_O1   | 2.21771(3)  | Ca2_O3  | 2.75879(4)  | Ba1_O1  | 2.59432(4) | Ba2_O3  | 2.73606(4)  |
| Ca1_O2   | 2.78134(4)  | Ca2_O3  | 2.40705(4)  | Ba1_O2  | 2.34602(3) | Ba2_O3  | 2.41245(4)  |
| Ca1_O2   | 2.78078(4)  | Ca2_O3  | 2.75879(4)  | Ba1_O2  | 2.34536(3) | Ba2_O3  | 2.73606(4)  |
| Ca1_O2   | 2.78089(4)  | Ca2_O3  | 2.40705(4)  | Ba1_O2  | 2.34549(3) | Ba2_O3  | 2.41245(4)  |
| Ca1_O3   | 2.94914(5)  | Ca2_Cl1 | 3.03689(4)  | Ba1_O3  | 2.80595(5) | Ba2_Cl1 | 3.03805(4)  |
| Ca1_O3   | 2.94854(5)  | Ca2_Cl1 | 3.03689(4)  | Ba1_O3  | 2.80532(5) | Ba2_Cl1 | 3.03805(4)  |
| Ca1_O3   | 2.94944(5)  |         |             | Ba1_O3  | 2.80627(5) |         |             |
| Ca1-O    | 2.649       | Ca2-O   | 2.744       | Ba1-O   | 2.582      | Ba2-O   | 2.739       |
| x = 0.50 |             |         |             |         |            |         |             |
| Ca1_O1   | 2.04326(8)  | Ca2_O1  | 3.05540(14) | Ba1_O1  | 2.62773(9) | Ba2_O1  | 3.03765(14) |
| Ca1_O1   | 2.04356(8)  | Ca2_O2  | 2.64265(12) | Ba1_O1  | 2.62797(9) | Ba2_O2  | 2.63774(12) |
| Ca1_O1   | 2.04411(8)  | Ca2_O3  | 2.86230(11) | Ba1_O1  | 2.62839(9) | Ba2_O3  | 2.87678(11) |
| Ca1_O2   | 3.21773(12) | Ca2_O3  | 2.46174(11) | Ba1_O2  | 2.50018(8) | Ba2_O3  | 2.45413(11) |

|        |             |         |             |        |             |         |             |
|--------|-------------|---------|-------------|--------|-------------|---------|-------------|
| Ca1_O2 | 3.21724(12) | Ca2_O3  | 2.86230(11) | Ba1_O2 | 2.49955(8)  | Ba2_O3  | 2.87678(11) |
| Ca1_O2 | 3.21726(12) | Ca2_O3  | 2.46174(11) | Ba1_O2 | 2.49957(8)  | Ba2_O3  | 2.45413(11) |
| Ca1_O3 | 2.99044(11) | Ca2_Cl1 | 3.12537(11) | Ba1_O3 | 2.71837(12) | Ba2_Cl1 | 3.13710(11) |
| Ca1_O3 | 2.98985(11) | Ca2_Cl1 | 3.12537(11) | Ba1_O3 | 2.71773(12) | Ba2_Cl1 | 3.13710(11) |
| Ca1_O3 | 2.99073(11) |         |             | Ba1_O3 | 2.71869(12) |         |             |
| Ca1-O  | 2.750       | Ca2-O   | 2.825       | Ba1-O  | 2.615       | Ba2-O   | 2.826       |

x = 0.75

|        |            |         |            |        |            |         |            |
|--------|------------|---------|------------|--------|------------|---------|------------|
| Ca1_O2 | 2.30322(2) | Ca2_O1  | 1.24925(1) | Ba1_O1 | 2.65509(2) | Ba2_O1  | 2.93615(2) |
| Ca1_O2 | 2.30236(2) | Ca2_O1  | 2.74718(2) | Ba1_O1 | 2.65540(2) | Ba2_O2  | 2.29168(2) |
| Ca1_O2 | 2.30256(2) | Ca2_O2  | 3.06848(2) | Ba1_O1 | 2.65582(2) | Ba2_O3  | 3.02548(2) |
| Ca1_O3 | 3.16331(3) | Ca2_O3  | 2.79558(2) | Ba1_O2 | 2.83637(2) | Ba2_O3  | 2.49210(2) |
| Ca1_O3 | 3.16295(3) | Ca2_O3  | 2.67251(2) | Ba1_O2 | 2.83567(2) | Ba2_O3  | 3.02548(2) |
| Ca1_O3 | 3.16232(3) | Ca2_O3  | 2.79558(2) | Ba1_O2 | 2.83583(2) | Ba2_O3  | 2.49210(2) |
| Ca1_O1 | 3.34739(2) | Ca2_Cl1 | 4.14668(2) | Ba1_O3 | 3.10868(3) | Ba2_Cl1 | 3.19551(2) |
| Ca1_O1 | 3.34739(2) | Ca2_Cl1 | 4.14668(2) | Ba1_O3 | 3.10807(3) | Ba2_Cl1 | 3.19551(2) |
| Ca1_O1 | 3.34739(2) |         |            | Ba1_O3 | 3.10905(3) |         |            |
| Ca1-O  | 2.938      | Ca2-O   | 2.922      | Ba1-O  | 2.900      | Ba2-O   | 2.832      |

x = 1

|        |            |  |  |         |            |  |  |
|--------|------------|--|--|---------|------------|--|--|
| Ba1_O1 | 2.85002(1) |  |  | Ba2_O1  | 3.09801(2) |  |  |
| Ba1_O1 | 2.85031(1) |  |  | Ba2_O2  | 2.90283(2) |  |  |
| Ba1_O1 | 2.85077(1) |  |  | Ba2_O3  | 2.81374(1) |  |  |
| Ba1_O2 | 2.64436(1) |  |  | Ba2_O3  | 2.71775(2) |  |  |
| Ba1_O2 | 2.64376(1) |  |  | Ba2_O3  | 2.81374(1) |  |  |
| Ba1_O2 | 2.64373(1) |  |  | Ba2_O3  | 2.71775(2) |  |  |
| Ba1_O3 | 3.09412(2) |  |  | Ba2_Cl1 | 3.22378(1) |  |  |
| Ba1_O3 | 3.09345(2) |  |  | Ba2_Cl1 | 3.22378(1) |  |  |
| Ba1_O3 | 3.09443(2) |  |  |         |            |  |  |
| Ba1-O  | 2.863      |  |  | Ba2-O   | 2.939      |  |  |

---

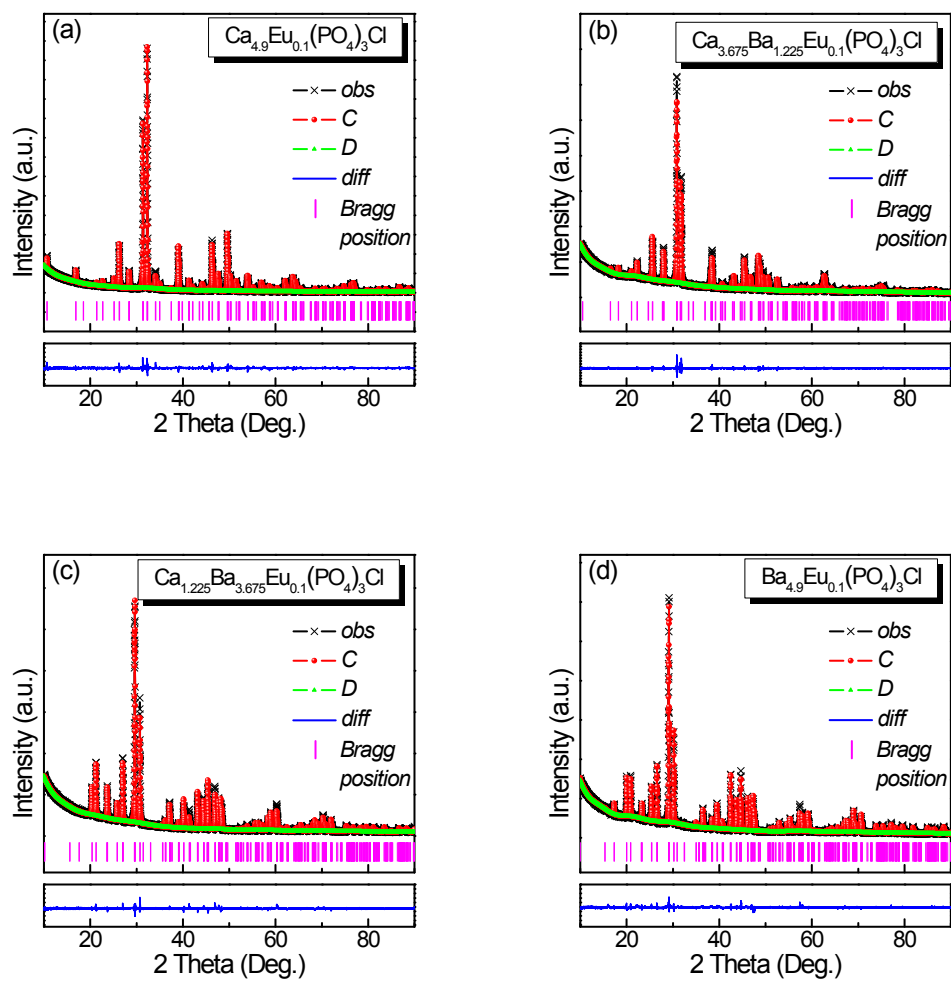

**Figure S1.** The Rietveld fit of (a)  $\text{Ca}_{4.9}\text{Eu}_{0.1}(\text{PO}_4)_3\text{Cl}$ , (b)  $\text{Ca}_{3.675}\text{Ba}_{1.225}\text{Eu}_{0.1}(\text{PO}_4)_3\text{Cl}$ , (c)  $\text{Ca}_{1.225}\text{Ba}_{3.675}\text{Eu}_{0.1}(\text{PO}_4)_3\text{Cl}$  and (d)  $\text{Ba}_{4.9}\text{Eu}_{0.1}(\text{PO}_4)_3\text{Cl}$  XRD patterns by the GSAS program.

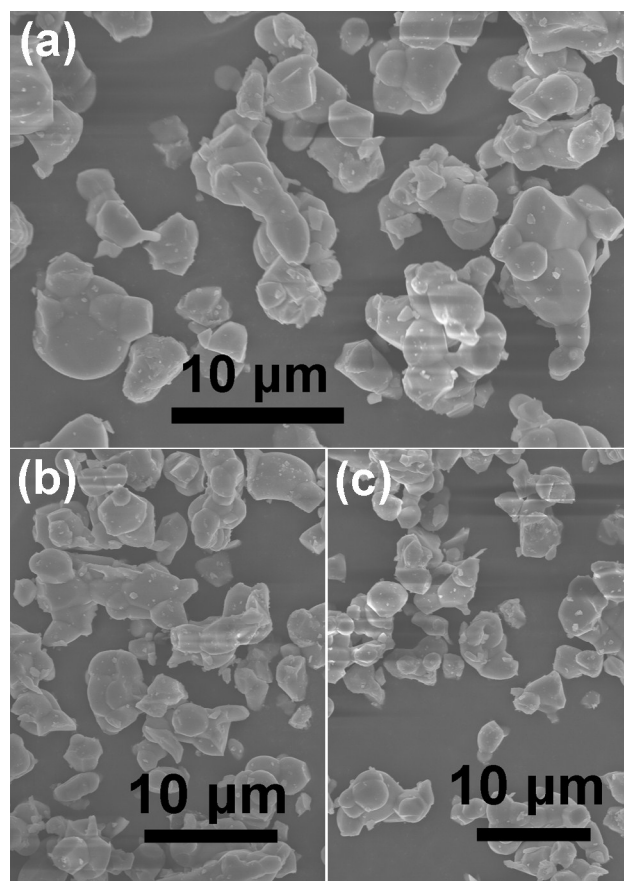

**Figure S2.** The SEM image of the representative samples: (a) CPOCl, (b) CPOCl-Ba<sub>0.5</sub> and (c) BPOCl.

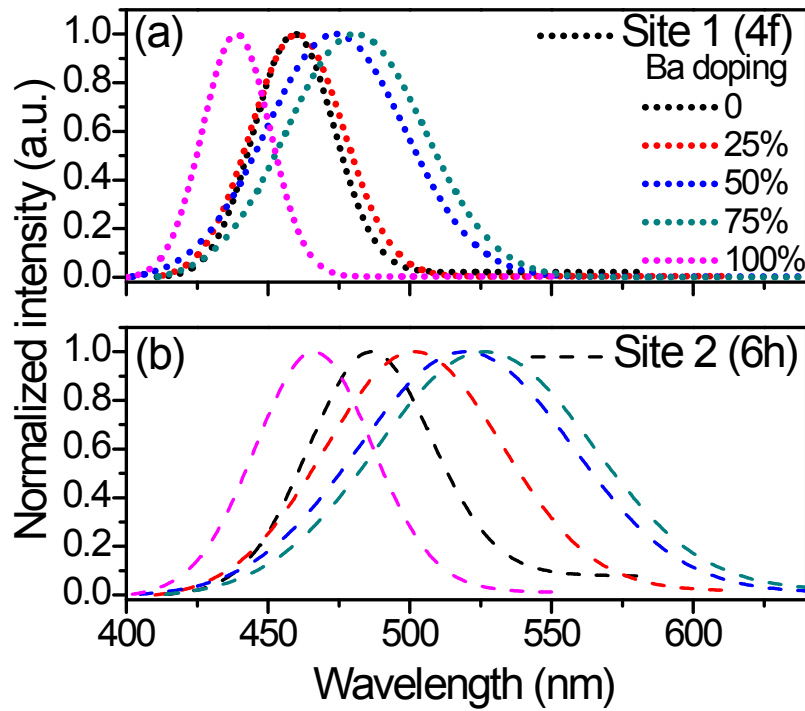

**Figure S3.** The normalized Gaussian peaks fitting photoluminescence emission (PL) spectra of  $\text{Ca}_{4.9(1-x)}\text{Ba}_{4.9x}\text{Eu}_{0.1}(\text{PO}_4)_3\text{Cl}$  ( $x = 0, 0.25, 0.5, 0.75, 1$ ) samples at (a)  $4f$  sites and (b)  $6h$  sites, respectively.

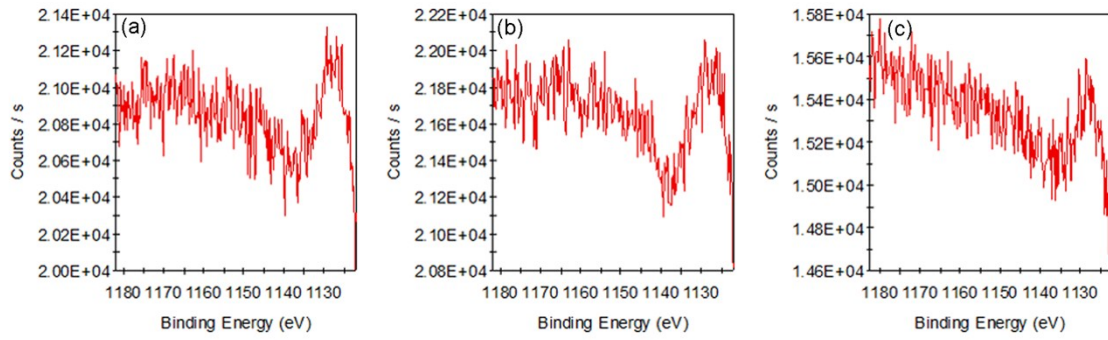

**Figure S4.** The high resolution Eu 3d XPS spectra for the representative samples: (a) CPOCl, (b) CPOCl-Ba<sub>0.5</sub> and (c) BPOCl.

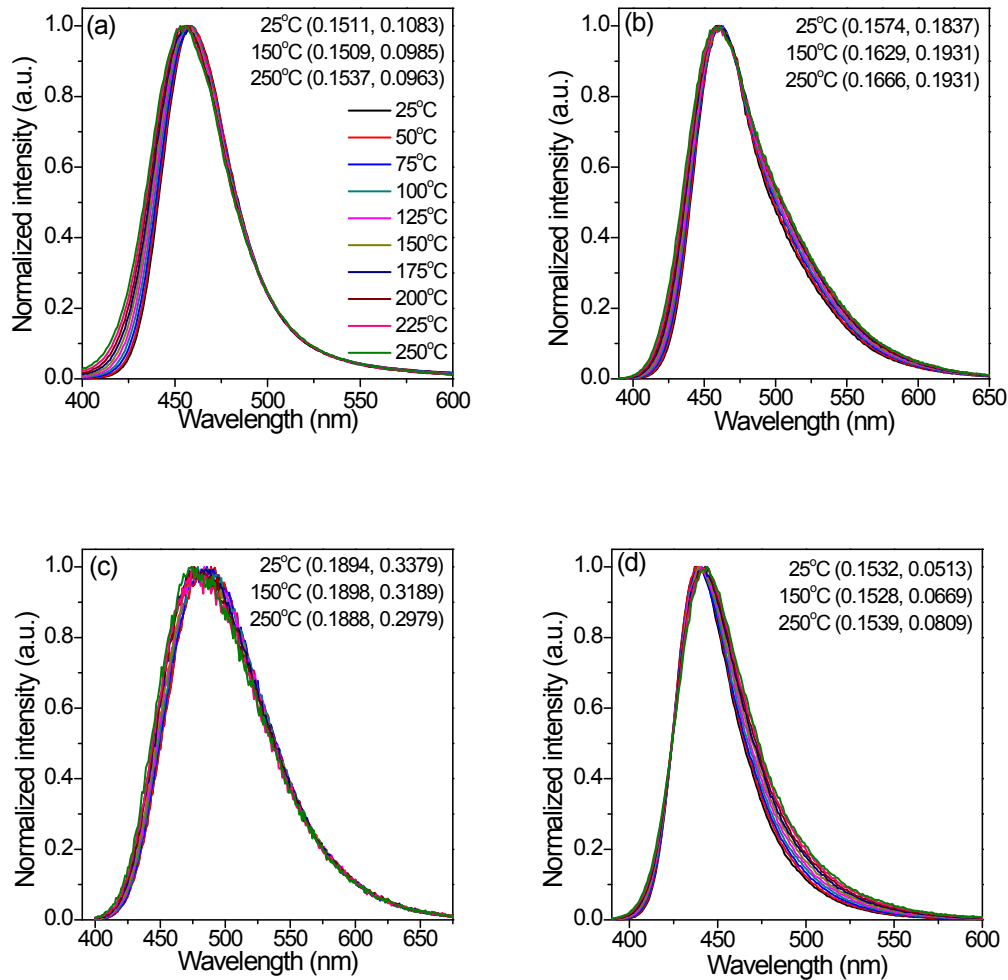

**Figure S5.** The normalized PL spectra of Ca<sub>2.45</sub>Ba<sub>2.45</sub>Eu<sub>0.1</sub>(PO<sub>4</sub>)<sub>3</sub>Cl (a)  $x = 0$ , (b)  $x = 0.25$ , (c)  $x = 0.75$ , (d)  $x = 1$  with temperatures from 25°C to 250°C ( $\lambda_{\text{ex}} = 400 \text{ nm}$ ).
